# Supplementary material
Source: Springer Nature journal article supplement (https://www.springermedizin.de/resource/supplementary/12916_2010_281_MOESM5_ESM.pdf/9599544)
Supplement: MOESM5 [file 9599544]

**Flynn manipulation prediction rule**

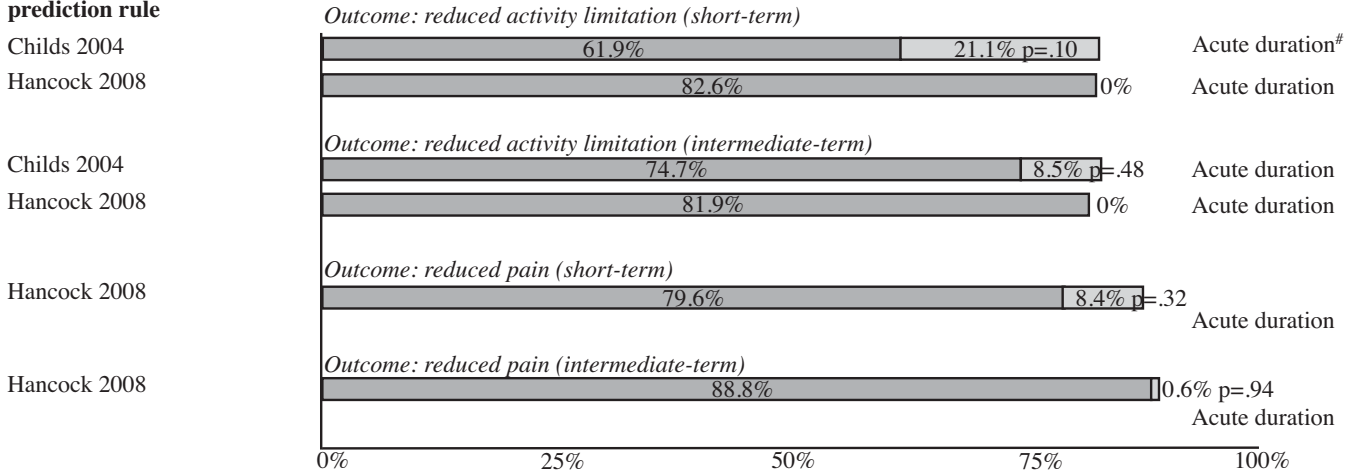

**Legend:**

- The proportion of additional improvement attributable to the treatment effect modifier.
- The proportion of improvement attributable to other reasons (natural history, non-specific treatment effects and the likely improvement had this group received the comparison treatment).

The p value is the alpha level for the mean additional effect of the treatment effect modifier (from Table 6).
